# Supplementary material for: Age-related change in mammographic breast density of women without history of breast cancer over a 10-year retrospective study
Source: PeerJ. 2023 Feb 14;11:e14836. doi: 10.7717/peerj.14836 (PMC9936867; doi:10.7717/peerj.14836)
Supplement: Supplemental Information 1 — The year the mammogram was taken, age, BMI, and breast density determination. [file peerj-11-14836-s001.xlsx]

## Sheet: Sheet1
dummy ID	later	year	age	BMI	history	Breast density
1	R	2013	50	24.1	1	3
1	L	2013	50	24.1	1	3
1	R	2014	51	25.2	1	3
1	L	2014	51	25.2	1	3
1	L	2015	52	25.1	1	3
1	R	2015	52	25.1	1	3
1	R	2016	53	25.3	1	3
1	L	2016	53	25.3	1	3
1	R	2017	54	25.8	1	3
1	L	2017	54	25.8	1	3
1	R	2018	55	27.1	1	3
1	L	2018	55	27.1	1	3
1	R	2019	56	26.7	1	3
1	L	2019	56	26.7	1	3
1	R	2020	57	26.4	1	3
1	L	2020	57	26.4	1	3
2	R	2011	46	21.5	0	3
2	L	2011	46	21.5	0	4
2	R	2012	47	21.3	0	3
2	L	2012	47	21.3	0	3
2	R	2013	48	21.6	0	3
2	L	2013	48	21.6	0	3
2	R	2014	49	21.8	0	3
2	L	2014	49	21.8	0	3
2	R	2015	50	21.8	0	3
2	L	2015	50	21.8	0	3
2	R	2016	51	22.2	0	3
2	L	2016	51	22.2	0	3
2	R	2017	52	22.8	0	3
2	L	2017	52	22.8	0	3
2	R	2018	53	21.7	0	3
2	L	2018	53	21.7	0	3
2	R	2019	54	21.5	0	3
2	L	2019	54	21.5	0	3
2	R	2020	55	21.8	0	3
2	L	2020	55	21.8	0	3
3	R	2012	50	23.5	1	3
3	L	2012	50	23.5	1	3
3	R	2013	51	24.8	1	2
3	L	2013	51	24.8	1	2
3	R	2014	52	23.8	1	3
3	L	2014	52	23.8	1	3
3	R	2015	53	21.7	1	3
3	L	2015	53	21.7	1	3
3	R	2016	54	20.3	1	3
3	L	2016	54	20.3	1	3
3	R	2017	55	22	1	3
3	L	2017	55	22	1	3
3	R	2018	56	23	1	3
3	L	2018	56	23	1	3
3	R	2019	57	23.4	1	3
3	L	2019	57	23.4	1	3
3	R	2020	58	24.1	1	3
3	L	2020	58	24.1	1	3
4	R	2012	38	21	0	2
4	L	2012	38	21	0	3
4	L	2013	39	18.7	0	3
4	R	2013	39	18.7	0	2
4	L	2014	40	19.6	0	3
4	R	2014	40	19.6	0	3
4	R	2015	41	19.9	0	3
4	L	2015	41	19.9	0	3
4	R	2016	42	21.3	0	3
4	L	2016	42	21.3	0	3
4	R	2017	43	22.2	0	3
4	L	2017	43	22.2	0	3
4	R	2018	44	23	0	3
4	L	2018	44	23	0	3
4	R	2019	45	23.5	0	3
4	L	2019	45	23.5	0	3
4	R	2020	46	23.5	0	3
4	L	2020	46	23.5	0	3
5	R	2011	44	#N/A	0	3
5	L	2011	44	#N/A	0	3
5	R	2012	45	20.1	0	3
5	L	2012	45	20.1	0	3
5	R	2013	46	#N/A	0	3
5	L	2013	46	#N/A	0	3
5	R	2014	47	20.3	0	3
5	L	2014	47	20.3	0	3
5	R	2015	47	20.1	0	3
5	L	2015	47	20.1	0	3
5	R	2016	48	20.3	0	3
5	L	2016	48	20.3	0	2
5	R	2017	50	20.5	0	3
5	L	2017	50	20.5	0	2
5	R	2018	50	20.3	0	3
5	L	2018	50	20.3	0	3
5	R	2019	52	20.7	0	3
5	L	2019	52	20.7	0	3
5	R	2020	53	21	0	2
5	L	2020	53	21	0	2
6	R	2012	48	19	1	3
6	L	2012	48	19	1	3
6	R	2013	49	18.8	1	3
6	L	2013	49	18.8	1	3
6	L	2014	50	19	1	3
6	R	2014	50	19	1	2
6	R	2015	51	19.1	1	2
6	L	2015	51	19.1	1	3
6	R	2016	52	19.1	1	3
6	L	2016	52	19.1	1	3
6	R	2017	53	19.3	1	3
6	L	2017	53	19.3	1	3
6	R	2018	54	19	1	3
6	L	2018	54	19	1	3
6	R	2019	55	19.8	1	3
6	L	2019	55	19.8	1	3
6	R	2020	56	20.9	1	3
6	L	2020	56	20.9	1	3
7	R	2012	54	18.6	0	3
7	L	2012	54	18.6	0	3
7	R	2013	55	17.7	0	4
7	L	2013	55	17.7	0	3
7	L	2014	56	17.9	0	3
7	R	2014	56	17.9	0	3
7	R	2015	57	17.5	0	3
7	L	2015	57	17.5	0	3
7	R	2016	58	17.2	0	3
7	L	2016	58	17.2	0	3
7	R	2017	59	18.4	0	3
7	L	2017	59	18.4	0	3
7	R	2018	60	17.7	0	3
7	L	2018	60	17.7	0	3
7	R	2019	61	18.1	0	3
7	L	2019	61	18.1	0	2
7	R	2020	62	18.2	0	3
7	L	2020	62	18.2	0	3
8	R	2011	49	22.4	0	3
8	L	2011	49	22.4	0	3
8	R	2012	50	22.2	0	3
8	L	2012	50	22.2	0	3
8	R	2013	51	22.4	0	3
8	L	2013	51	22.4	0	3
8	R	2014	52	21.9	0	3
8	L	2014	52	21.9	0	3
8	R	2015	53	21.6	0	3
8	L	2015	53	21.6	0	3
8	R	2016	54	22.2	0	3
8	L	2016	54	22.2	0	3
8	R	2017	55	22.1	0	3
8	L	2017	55	22.1	0	3
8	R	2018	56	22.4	0	3
8	L	2018	56	22.4	0	3
8	R	2019	57	21.7	0	3
8	L	2019	57	21.7	0	3
9	R	2011	64	18.8	1	3
9	L	2011	64	18.8	1	3
9	R	2012	65	18.8	1	3
9	L	2012	65	18.8	1	3
9	R	2013	66	18.9	1	3
9	L	2013	66	18.9	1	3
9	L	2014	67	18.8	1	3
9	R	2014	67	18.8	1	3
9	R	2015	68	19.1	1	3
9	L	2015	68	19.1	1	3
9	R	2016	69	18.5	1	3
9	L	2016	69	18.5	1	3
9	R	2017	70	18.9	1	3
9	L	2017	70	18.9	1	3
9	R	2018	71	18.4	1	3
9	L	2018	71	18.4	1	3
9	R	2019	72	19.3	1	3
9	L	2019	72	19.3	1	3
9	R	2020	73	19.1	1	3
9	L	2020	73	19.1	1	3
10	R	2011	50	20.7	0	2
10	L	2011	50	20.7	0	3
10	R	2012	51	21	0	2
10	L	2012	51	21	0	3
10	R	2013	52	20.7	0	2
10	L	2013	52	20.7	0	2
10	R	2014	53	20.7	0	3
10	L	2014	53	20.7	0	2
10	R	2015	54	21.1	0	2
10	L	2015	54	21.1	0	2
10	R	2016	55	22	0	3
10	L	2016	55	22	0	2
10	R	2017	56	21.8	0	3
10	L	2017	56	21.8	0	2
10	R	2018	57	21.9	0	3
10	L	2018	57	21.9	0	2
10	R	2019	58	21.5	0	3
10	L	2019	58	21.5	0	3
10	R	2020	59	22.1	0	2
10	L	2020	59	22.1	0	2
11	R	2012	47	19.1	1	4
11	L	2012	47	19.1	1	3
11	R	2013	48	19.2	1	3
11	L	2013	48	19.2	1	4
11	L	2014	49	19.4	1	3
11	R	2014	49	19.4	1	3
11	R	2015	50	19.1	1	3
11	L	2015	50	19.1	1	3
11	R	2016	51	19.1	1	3
11	L	2016	51	19.1	1	3
11	R	2017	52	18.7	1	3
11	L	2017	52	18.7	1	3
11	R	2018	53	18.7	1	3
11	L	2018	53	18.7	1	3
11	R	2019	54	19.6	1	3
11	L	2019	54	19.6	1	3
11	R	2020	55	20.8	1	3
11	L	2020	55	20.8	1	3
12	R	2012	45	23.4	1	2
12	L	2012	45	23.4	1	3
12	R	2013	46	23.7	1	3
12	L	2013	46	23.7	1	2
12	R	2014	47	22.4	1	3
12	L	2014	47	22.4	1	2
12	R	2015	48	21.3	1	3
12	L	2015	48	21.3	1	2
12	R	2016	49	21.2	1	3
12	L	2016	49	21.2	1	3
12	R	2017	50	21	1	3
12	L	2017	50	21	1	3
12	R	2018	51	18.6	1	3
12	L	2018	51	18.6	1	3
12	R	2019	52	18.9	1	3
12	L	2019	52	18.9	1	3
12	R	2020	53	18.7	1	3
12	L	2020	53	18.7	1	3
13	R	2012	43	22.7	1	3
13	L	2012	43	22.7	1	3
13	R	2013	44	22.4	1	2
13	L	2013	44	22.4	1	2
13	R	2014	45	23.3	1	2
13	L	2014	45	23.3	1	3
13	R	2015	46	23.1	1	3
13	L	2015	46	23.1	1	3
13	R	2016	47	23.8	1	2
13	L	2016	47	23.8	1	3
13	R	2017	48	23.9	1	3
13	L	2017	48	23.9	1	3
13	R	2018	49	22.8	1	3
13	L	2018	49	22.8	1	3
13	R	2019	50	23.3	1	3
13	L	2019	50	23.3	1	3
13	R	2020	51	24.2	1	3
13	L	2020	51	24.2	1	3
14	R	2012	48	28.1	1	2
14	L	2012	48	28.1	1	3
14	R	2013	49	28.2	1	3
14	L	2013	49	28.2	1	3
14	L	2014	50	27.9	1	2
14	R	2014	50	27.9	1	3
14	R	2015	51	27.7	1	3
14	L	2015	51	27.7	1	2
14	R	2016	52	28.1	1	3
14	L	2016	52	28.1	1	3
14	R	2017	53	28.5	1	3
14	L	2017	53	28.5	1	2
14	R	2018	55	29.1	1	3
14	L	2018	55	29.1	1	2
14	R	2019	56	28.1	1	3
14	L	2019	56	28.1	1	2
14	R	2020	57	28.7	1	3
14	L	2020	57	28.7	1	2
15	R	2011	42	22	0	2
15	L	2011	42	22	0	2
15	R	2012	43	21.9	0	2
15	L	2012	43	21.9	0	3
15	R	2013	44	21.9	0	2
15	L	2013	44	21.9	0	2
15	R	2014	45	22	0	2
15	L	2014	45	22	0	2
15	R	2015	46	22.2	0	2
15	L	2015	46	22.2	0	2
15	R	2016	47	22.1	0	2
15	L	2016	47	22.1	0	3
15	R	2017	48	22.6	0	2
15	L	2017	48	22.6	0	3
15	R	2018	49	21.9	0	2
15	L	2018	49	21.9	0	3
15	R	2019	50	20.4	0	3
15	L	2019	50	20.4	0	3
15	R	2020	51	20.3	0	2
15	L	2020	51	20.3	0	2
16	R	2012	40	18.2	0	3
16	L	2012	40	18.2	0	3
16	R	2013	41	18.9	0	3
16	L	2013	41	18.9	0	3
16	R	2014	42	19	0	3
16	L	2014	42	19	0	3
16	R	2015	43	20.4	0	3
16	L	2015	43	20.4	0	3
16	R	2016	44	20	0	3
16	L	2016	44	20	0	3
16	R	2017	45	20.6	0	3
16	L	2017	45	20.6	0	3
16	R	2018	46	20.4	0	3
16	L	2018	46	20.4	0	3
16	R	2019	47	20	0	3
16	L	2019	47	20	0	2
16	R	2020	48	20	0	3
16	L	2020	48	20	0	3
17	R	2012	50	17	0	3
17	L	2012	50	17	0	3
17	R	2013	51	16.8	0	1
17	L	2013	51	16.8	0	3
17	R	2014	52	15.6	0	4
17	L	2014	52	15.6	0	4
17	R	2015	53	16.2	0	4
17	L	2015	53	16.2	0	3
17	R	2016	54	16.8	0	3
17	L	2016	54	16.8	0	3
17	R	2017	55	16.7	0	4
17	L	2017	55	16.7	0	3
17	R	2018	56	16.9	0	3
17	L	2018	56	16.9	0	3
17	R	2019	57	15.8	0	3
17	L	2019	57	15.8	0	3
17	R	2020	58	15.5	0	3
17	L	2020	58	15.5	0	3
18	R	2012	51	20.5	0	3
18	L	2012	51	20.5	0	3
18	R	2013	52	20.4	0	3
18	L	2013	52	20.4	0	3
18	R	2014	53	20.7	0	2
18	L	2014	53	20.7	0	3
18	R	2015	54	20.8	0	3
18	L	2015	54	20.8	0	2
18	R	2016	55	21.4	0	3
18	L	2016	55	21.4	0	3
18	R	2017	56	21.7	0	3
18	L	2017	56	21.7	0	3
18	R	2018	57	22.2	0	3
18	L	2018	57	22.2	0	3
18	R	2019	58	22	0	3
18	L	2019	58	22	0	3
18	R	2020	59	22.3	0	3
18	L	2020	59	22.3	0	3
19	R	2011	45	19.1	0	3
19	L	2011	45	19.1	0	2
19	R	2012	46	19.6	0	3
19	L	2012	46	19.6	0	2
19	R	2013	47	19.7	0	2
19	L	2013	47	19.7	0	2
19	L	2014	48	20.2	0	2
19	R	2014	48	20.2	0	2
19	R	2015	49	20.2	0	3
19	L	2015	49	20.2	0	3
19	R	2016	50	20.5	0	2
19	L	2016	50	20.5	0	3
19	R	2017	51	20.7	0	2
19	L	2017	51	20.7	0	2
19	R	2018	52	20.6	0	2
19	L	2018	52	20.6	0	2
19	R	2019	53	21.4	0	2
19	L	2019	53	21.4	0	2
19	R	2020	54	17.9	0	2
19	L	2020	54	17.9	0	2
20	R	2011	51	30	0	2
20	L	2011	51	30	0	1
20	R	2012	52	30.6	0	2
20	L	2012	52	30.6	0	1
20	R	2013	53	31.5	0	1
20	L	2013	53	31.5	0	1
20	R	2014	54	31	0	2
20	L	2014	54	31	0	1
20	R	2015	55	32.4	0	2
20	L	2015	55	32.4	0	1
20	R	2016	56	33.2	0	2
20	L	2016	56	33.2	0	1
20	R	2017	57	33.2	0	2
20	L	2017	57	33.2	0	1
20	R	2018	58	32.4	0	2
20	L	2018	58	32.4	0	1
20	R	2019	59	31.4	0	1
20	L	2019	59	31.4	0	2
20	R	2020	60	31.7	0	2
20	L	2020	60	31.7	0	1
21	R	2012	46	#N/A	0	3
21	L	2012	46	#N/A	0	2
21	R	2013	47	21.5	0	2
21	L	2013	47	21.5	0	2
21	R	2014	48	21.7	0	2
21	L	2014	48	21.7	0	2
21	L	2015	49	21.6	0	2
21	R	2015	49	21.6	0	2
21	R	2016	50	21.9	0	2
21	L	2016	50	21.9	0	2
21	R	2017	51	22	0	2
21	L	2017	51	22	0	2
21	R	2018	52	22	0	2
21	L	2018	52	22	0	2
21	R	2019	53	22	0	2
21	L	2019	53	22	0	2
21	R	2020	54	22.4	0	2
21	L	2020	54	22.4	0	2
22	R	2012	44	21.2	0	3
22	L	2012	44	21.2	0	3
22	R	2013	45	22.2	0	3
22	L	2013	45	22.2	0	2
22	L	2014	46	22.7	0	3
22	R	2014	46	22.7	0	3
22	L	2015	47	22.9	0	3
22	R	2015	47	22.9	0	3
22	R	2016	48	24.6	0	3
22	L	2016	48	24.6	0	2
22	R	2017	49	26.5	0	3
22	L	2017	49	26.5	0	3
22	R	2018	50	26.2	0	3
22	L	2018	50	26.2	0	2
22	R	2019	51	24.8	0	3
22	L	2019	51	24.8	0	3
23	R	2012	44	15.7	0	3
23	L	2012	44	15.7	0	3
23	R	2013	45	15.1	0	3
23	L	2013	45	15.1	0	2
23	R	2014	46	15.3	0	3
23	L	2014	46	15.3	0	4
23	R	2015	47	15.8	0	3
23	L	2015	47	15.8	0	3
23	R	2016	48	15.7	0	3
23	L	2016	48	15.7	0	3
23	R	2017	49	15.6	0	3
23	L	2017	49	15.6	0	3
23	R	2018	50	14.3	0	3
23	L	2018	50	14.3	0	3
23	R	2019	51	15.2	0	3
23	L	2019	51	15.2	0	3
23	R	2020	52	15.4	0	2
23	L	2020	52	15.4	0	4
24	L	2011	50	22.2	1	3
24	L	2012	51	22.5	1	3
24	L	2013	52	22.8	1	3
24	L	2014	53	21.5	1	3
24	L	2015	54	21.8	1	3
24	L	2016	55	22.6	1	3
24	L	2017	56	23.4	1	3
24	L	2018	57	22.4	1	3
24	L	2019	58	23	1	3
24	L	2020	59	23.8	1	3
25	R	2011	42	17.6	1	3
25	L	2011	42	17.6	1	3
25	R	2012	43	18.2	1	4
25	L	2012	43	18.2	1	4
25	R	2013	44	18.4	1	4
25	L	2013	44	18.4	1	3
25	R	2014	45	18.7	1	3
25	L	2014	45	18.7	1	4
25	R	2015	46	19.5	1	3
25	L	2015	46	19.5	1	3
25	R	2016	47	19.7	1	3
25	L	2016	47	19.7	1	3
25	R	2017	48	18.6	1	3
25	L	2017	48	18.6	1	3
25	R	2018	49	19.2	1	3
25	L	2018	49	19.2	1	3
25	R	2019	50	19.9	1	3
25	L	2019	50	19.9	1	3
25	R	2020	51	18.9	1	3
25	L	2020	51	18.9	1	3
26	R	2012	52	17.2	1	3
26	L	2012	52	17.2	1	3
26	R	2013	53	16.9	1	4
26	L	2013	53	16.9	1	4
26	R	2014	54	16.1	1	4
26	L	2014	54	16.1	1	4
26	R	2015	55	16.1	1	4
26	L	2015	55	16.1	1	4
26	R	2016	56	15.9	1	4
26	L	2016	56	15.9	1	3
26	R	2017	57	16.6	1	3
26	L	2017	57	16.6	1	4
26	R	2018	58	16.4	1	3
26	L	2018	58	16.4	1	4
26	R	2019	59	16.7	1	3
26	L	2019	59	16.7	1	4
26	R	2020	60	16.4	1	3
26	L	2020	60	16.4	1	4
27	R	2012	46	22.6	1	4
27	L	2012	46	22.6	1	2
27	R	2013	47	21.7	1	3
27	L	2013	47	21.7	1	2
27	R	2014	47	23.1	1	2
27	L	2014	47	23.1	1	2
27	R	2015	48	22.9	1	3
27	L	2015	48	22.9	1	2
27	R	2016	49	23.6	1	3
27	L	2016	49	23.6	1	2
27	R	2017	50	24	1	2
27	L	2017	50	24	1	2
27	R	2018	51	24.2	1	3
27	L	2018	51	24.2	1	2
27	R	2019	52	25.3	1	3
27	L	2019	52	25.3	1	2
27	R	2020	53	25	1	3
27	L	2020	53	25	1	2
28	R	2012	40	20.9	1	3
28	L	2012	40	20.9	1	3
28	R	2013	41	19.9	1	4
28	L	2013	41	19.9	1	2
28	R	2014	42	20.7	1	2
28	L	2014	42	20.7	1	3
28	R	2015	43	20.4	1	4
28	L	2015	43	20.4	1	2
28	R	2016	44	21.2	1	3
28	L	2016	44	21.2	1	3
28	R	2017	45	20.5	1	4
28	L	2017	45	20.5	1	3
28	R	2018	46	20.8	1	4
28	L	2018	46	20.8	1	3
28	R	2019	47	21.6	1	4
28	L	2019	47	21.6	1	3
28	R	2020	48	21.9	1	4
28	L	2020	48	21.9	1	3
29	R	2011	60	22.5	1	2
29	L	2011	60	22.5	1	3
29	R	2012	61	21.8	1	2
29	L	2012	61	21.8	1	2
29	R	2013	62	22.2	1	1
29	L	2013	62	22.2	1	2
29	R	2014	63	21.4	1	2
29	L	2014	63	21.4	1	2
29	R	2015	64	22	1	2
29	L	2015	64	22	1	2
29	R	2016	65	22.8	1	2
29	L	2016	65	22.8	1	2
29	R	2017	66	22.9	1	2
29	L	2017	66	22.9	1	2
29	R	2018	67	22.7	1	2
29	L	2018	67	22.7	1	2
29	R	2019	68	21.1	1	2
29	L	2019	68	21.1	1	2
29	R	2020	69	21	1	2
29	L	2020	69	21	1	2
30	R	2012	40	15.4	0	4
30	L	2012	40	15.4	0	4
30	R	2013	41	15.2	0	4
30	L	2013	41	15.2	0	4
30	L	2014	42	15	0	4
30	R	2014	42	15	0	4
30	R	2015	43	15	0	4
30	L	2015	43	15	0	4
30	R	2016	44	15	0	3
30	L	2016	44	15	0	4
30	R	2017	45	15.2	0	4
30	L	2017	45	15.2	0	4
30	R	2018	46	14.8	0	3
30	L	2018	46	14.8	0	4
30	R	2019	47	14.8	0	3
30	L	2019	47	14.8	0	4
30	R	2020	48	14.6	0	3
30	L	2020	48	14.6	0	4
31	R	2012	45	23	0	2
31	L	2012	45	23	0	2
31	R	2013	46	22.6	0	2
31	L	2013	46	22.6	0	2
31	L	2014	47	23.5	0	2
31	R	2014	47	23.5	0	2
31	R	2015	48	23.6	0	3
31	L	2015	48	23.6	0	2
31	R	2016	49	22.9	0	3
31	L	2016	49	22.9	0	2
31	R	2017	50	22.9	0	2
31	L	2017	50	22.9	0	2
31	R	2018	51	22.2	0	3
31	L	2018	51	22.2	0	3
31	R	2019	52	22.4	0	2
31	L	2019	52	22.4	0	2
31	R	2020	53	23.6	0	3
31	L	2020	53	23.6	0	2
32	R	2011	40	18.1	0	3
32	L	2011	40	18.1	0	3
32	R	2013	42	18.7	0	3
32	L	2013	42	18.7	0	3
32	R	2014	43	18.9	0	4
32	L	2014	43	18.9	0	3
32	L	2015	44	19.2	0	3
32	R	2015	44	19.2	0	3
32	R	2016	45	19.7	0	3
32	L	2016	45	19.7	0	3
32	L	2017	46	18.7	0	3
32	R	2017	46	18.7	0	2
32	R	2018	47	17.9	0	4
32	L	2018	47	17.9	0	3
33	R	2011	47	25.2	1	2
33	L	2011	47	25.2	1	3
33	R	2012	48	25.1	1	3
33	L	2012	48	25.1	1	3
33	L	2013	49	25.8	1	3
33	R	2013	49	25.8	1	2
33	R	2014	51	25.3	1	3
33	L	2014	51	25.3	1	3
33	R	2015	51	25.9	1	3
33	L	2015	51	25.9	1	3
33	R	2016	52	25.1	1	3
33	L	2016	52	25.1	1	3
33	R	2017	53	25.3	1	3
33	L	2017	53	25.3	1	3
33	R	2018	54	24.2	1	3
33	L	2018	54	24.2	1	2
33	R	2019	55	24.2	1	3
33	L	2019	55	24.2	1	3
33	R	2020	56	23.1	1	3
33	L	2020	56	23.1	1	3
34	R	2012	38	18.3	0	4
34	L	2012	38	18.3	0	4
34	R	2013	39	19.1	0	3
34	L	2013	39	19.1	0	4
34	L	2014	39	19.2	0	3
34	R	2014	39	19.2	0	3
34	R	2015	40	19.1	0	3
34	L	2015	40	19.1	0	3
34	R	2016	41	18.7	0	3
34	L	2016	41	18.7	0	3
34	R	2017	42	19.7	0	3
34	L	2017	42	19.7	0	3
34	R	2018	43	19.3	0	3
34	L	2018	43	19.3	0	3
34	R	2019	44	19	0	4
34	L	2019	44	19	0	3
34	R	2020	45	18.9	0	3
34	L	2020	45	18.9	0	3
35	L	2013	63	24.6	1	2
35	R	2013	63	24.6	1	3
35	L	2015	65	25.4	1	2
35	R	2015	65	25.4	1	3
35	R	2016	66	24.5	1	3
35	L	2016	66	24.5	1	2
35	L	2017	67	24.6	1	2
35	R	2017	67	24.6	1	3
35	R	2018	68	24.6	1	3
35	L	2018	68	24.6	1	2
35	R	2019	69	24.5	1	3
35	L	2019	69	24.5	1	2
35	R	2020	70	24.8	1	3
35	L	2020	70	24.8	1	2
36	R	2011	40	17.6	0	3
36	L	2011	40	17.6	0	3
36	R	2013	42	17.8	0	3
36	L	2013	42	17.8	0	3
36	R	2014	43	17.9	0	3
36	L	2014	43	17.9	0	3
36	R	2015	44	18.3	0	2
36	L	2015	44	18.3	0	2
36	R	2016	45	18.2	0	3
36	L	2016	45	18.2	0	3
36	L	2017	46	18.2	0	2
36	R	2017	46	18.2	0	2
36	R	2018	47	18.1	0	2
36	L	2018	47	18.1	0	2
37	R	2011	50	18.9	0	3
37	L	2011	50	18.9	0	3
37	R	2012	51	18.1	0	3
37	L	2012	51	18.1	0	3
37	R	2013	52	17.8	0	3
37	L	2013	52	17.8	0	3
37	R	2014	53	18.3	0	3
37	L	2014	53	18.3	0	3
37	R	2015	54	19.4	0	3
37	L	2015	54	19.4	0	3
37	R	2016	55	19.8	0	3
37	L	2016	55	19.8	0	3
37	R	2017	56	20.2	0	3
37	L	2017	56	20.2	0	3
37	R	2018	57	20.2	0	3
37	L	2018	57	20.2	0	3
37	R	2019	58	20.1	0	3
37	L	2019	58	20.1	0	3
37	R	2020	59	21	0	3
37	L	2020	59	21	0	3
38	R	2012	56	23.1	0	3
38	L	2012	56	23.1	0	3
38	R	2013	57	23.5	0	3
38	L	2013	57	23.5	0	2
38	R	2014	58	23.9	0	3
38	L	2014	58	23.9	0	3
38	R	2015	59	24.4	0	3
38	L	2015	59	24.4	0	3
38	R	2016	60	24.6	0	3
38	L	2016	60	24.6	0	3
38	R	2017	61	24.8	0	3
38	L	2017	61	24.8	0	3
38	R	2018	62	24.7	0	3
38	L	2018	62	24.7	0	2
38	R	2019	63	24.9	0	3
38	L	2019	63	24.9	0	3
38	R	2020	64	24.9	0	3
38	L	2020	64	24.9	0	3
39	R	2012	54	20.2	0	2
39	L	2012	54	20.2	0	2
39	R	2013	55	19.7	0	3
39	L	2013	55	19.7	0	2
39	R	2014	56	18.7	0	2
39	L	2014	56	18.7	0	2
39	R	2015	57	18.7	0	3
39	L	2015	57	18.7	0	3
39	R	2016	58	19.2	0	2
39	L	2016	58	19.2	0	2
39	R	2017	59	19.3	0	2
39	L	2017	59	19.3	0	2
39	R	2018	60	19.9	0	2
39	L	2018	60	19.9	0	2
39	R	2019	61	20.1	0	2
39	L	2019	61	20.1	0	2
39	R	2020	62	20.4	0	3
39	L	2020	62	20.4	0	3
40	R	2012	55	18.5	0	3
40	L	2012	55	18.5	0	4
40	R	2013	56	18.4	0	4
40	L	2013	56	18.4	0	4
40	L	2014	57	18.3	0	4
40	R	2014	57	18.3	0	4
40	R	2015	58	18.2	0	3
40	L	2015	58	18.2	0	4
40	R	2016	59	18.3	0	3
40	L	2016	59	18.3	0	3
40	R	2017	60	18.3	0	3
40	L	2017	60	18.3	0	4
40	R	2018	61	18.6	0	3
40	L	2018	61	18.6	0	4
40	R	2019	62	18.1	0	4
40	L	2019	62	18.1	0	3
40	R	2020	63	18.3	0	3
40	L	2020	63	18.3	0	3
41	R	2012	65	19.9	0	3
41	L	2012	65	19.9	0	3
41	R	2013	66	20.5	0	2
41	L	2013	66	20.5	0	2
41	L	2014	67	20.2	0	2
41	R	2014	67	20.2	0	3
41	R	2015	68	20.6	0	3
41	L	2015	68	20.6	0	3
41	R	2016	69	20.8	0	3
41	L	2016	69	20.8	0	3
41	R	2017	70	20.8	0	3
41	L	2017	70	20.8	0	3
41	R	2018	71	20.8	0	3
41	L	2018	71	20.8	0	3
41	R	2019	72	20.8	0	3
41	L	2019	72	20.8	0	3
41	R	2020	73	19.6	0	3
41	L	2020	73	19.6	0	3
42	R	2011	42	21	1	3
42	L	2011	42	21	1	3
42	R	2012	43	21.8	1	3
42	L	2012	43	21.8	1	3
42	L	2013	44	22.3	1	3
42	R	2013	44	22.3	1	3
42	L	2014	45	22.4	1	3
42	R	2014	45	22.4	1	3
42	R	2015	46	22.7	1	3
42	L	2015	46	22.7	1	3
42	R	2016	47	22.9	1	3
42	L	2016	47	22.9	1	3
42	R	2017	48	23.3	1	3
42	L	2017	48	23.3	1	3
42	R	2018	49	22.7	1	3
42	L	2018	49	22.7	1	3
42	R	2019	50	21.9	1	4
42	L	2019	50	21.9	1	3
42	R	2020	51	22.3	1	3
42	L	2020	51	22.3	1	3
43	R	2012	55	24.7	0	2
43	L	2012	55	24.7	0	2
43	R	2013	56	25.7	0	1
43	L	2013	56	25.7	0	1
43	R	2014	57	26.2	0	1
43	L	2014	57	26.2	0	1
43	R	2015	58	26.7	0	1
43	L	2015	58	26.7	0	1
43	R	2016	59	26.9	0	2
43	L	2016	59	26.9	0	2
43	R	2017	60	26.5	0	2
43	L	2017	60	26.5	0	1
43	R	2018	61	27.5	0	1
43	L	2018	61	27.5	0	2
43	R	2019	62	27.8	0	1
43	L	2019	62	27.8	0	1
43	R	2020	63	27	0	1
43	L	2020	63	27	0	2
44	R	2012	48	20.2	0	3
44	L	2012	48	20.2	0	2
44	R	2013	49	19.5	0	2
44	L	2013	49	19.5	0	3
44	R	2014	50	19.5	0	2
44	L	2014	50	19.5	0	3
44	L	2015	51	19.5	0	3
44	R	2015	51	19.5	0	2
44	R	2016	52	19.4	0	2
44	L	2016	52	19.4	0	3
44	R	2017	53	19	0	3
44	L	2017	53	19	0	3
44	R	2018	54	19.6	0	3
44	L	2018	54	19.6	0	3
44	R	2019	55	19.4	0	3
44	L	2019	55	19.4	0	3
44	R	2020	56	19.1	0	3
44	L	2020	56	19.1	0	3
45	R	2012	41	19.5	0	4
45	L	2012	41	19.5	0	3
45	R	2013	42	#N/A	0	3
45	L	2013	42	#N/A	0	4
45	L	2014	43	19.7	0	4
45	R	2014	43	19.7	0	3
45	L	2015	44	20.1	0	4
45	R	2015	44	20.1	0	3
45	R	2016	45	20.4	0	3
45	L	2016	45	20.4	0	3
45	R	2017	46	20.2	0	3
45	L	2017	46	20.2	0	4
45	R	2018	47	20.3	0	3
45	L	2018	47	20.3	0	3
45	R	2019	48	20.1	0	3
45	L	2019	48	20.1	0	4
45	R	2020	49	20.5	0	3
45	L	2020	49	20.5	0	4
46	R	2012	57	20.4	1	3
46	L	2012	57	20.4	1	3
46	R	2013	58	18	1	3
46	L	2013	58	18	1	3
46	R	2014	59	19.2	1	4
46	L	2014	59	19.2	1	3
46	R	2015	60	20.6	1	3
46	L	2015	60	20.6	1	3
46	R	2016	61	21.2	1	3
46	L	2016	61	21.2	1	3
46	R	2017	62	21	1	3
46	L	2017	62	21	1	3
46	R	2018	63	21.8	1	3
46	L	2018	63	21.8	1	3
46	R	2019	64	21.2	1	3
46	L	2019	64	21.2	1	3
46	R	2020	65	20.2	1	3
46	L	2020	65	20.2	1	2
47	R	2011	43	19.8	0	3
47	L	2011	43	19.8	0	3
47	R	2012	44	18.5	0	4
47	L	2012	44	18.5	0	3
47	R	2013	45	19.2	0	3
47	L	2013	45	19.2	0	3
47	R	2014	46	19.3	0	4
47	L	2014	46	19.3	0	3
47	R	2015	47	19.3	0	3
47	L	2015	47	19.3	0	3
47	R	2016	48	19.1	0	3
47	L	2016	48	19.1	0	3
47	R	2017	49	19.3	0	3
47	L	2017	49	19.3	0	3
47	R	2018	50	19.4	0	3
47	L	2018	50	19.4	0	3
47	R	2019	51	19.7	0	4
47	L	2019	51	19.7	0	3
47	R	2020	52	19.7	0	3
47	L	2020	52	19.7	0	3
48	R	2011	48	21.2	1	3
48	L	2011	48	21.2	1	2
48	R	2012	49	21.9	1	3
48	L	2012	49	21.9	1	3
48	R	2013	50	21.4	1	4
48	L	2013	50	21.4	1	2
48	R	2014	51	22.4	1	2
48	L	2014	51	22.4	1	2
48	L	2015	52	22.9	1	2
48	R	2015	52	22.9	1	2
48	R	2016	53	22.3	1	2
48	L	2016	53	22.3	1	2
48	R	2017	54	23.5	1	2
48	L	2017	54	23.5	1	2
48	R	2018	55	24	1	2
48	L	2018	55	24	1	2
49	R	2012	47	20.6	1	3
49	L	2012	47	20.6	1	3
49	R	2013	48	20.2	1	3
49	L	2013	48	20.2	1	2
49	L	2014	49	20.1	1	3
49	R	2014	49	20.1	1	3
49	R	2015	50	20.1	1	3
49	L	2015	50	20.1	1	2
49	R	2016	51	19.9	1	3
49	L	2016	51	19.9	1	2
49	R	2017	52	19.4	1	2
49	L	2017	52	19.4	1	3
49	R	2018	53	20.1	1	2
49	L	2018	53	20.1	1	2
49	R	2019	54	19.9	1	2
49	L	2019	54	19.9	1	2
49	R	2020	55	20.1	1	2
49	L	2020	55	20.1	1	3
50	R	2012	59	24	1	3
50	L	2012	59	24	1	3
50	R	2013	60	23.7	1	3
50	L	2013	60	23.7	1	3
50	R	2014	61	23.4	1	3
50	L	2014	61	23.4	1	3
50	R	2015	62	23.3	1	3
50	L	2015	62	23.3	1	3
50	R	2016	63	24	1	3
50	L	2016	63	24	1	3
50	R	2017	64	25	1	3
50	L	2017	64	25	1	3
50	R	2018	65	25.6	1	3
50	L	2018	65	25.6	1	3
50	R	2019	66	25.9	1	3
50	L	2019	66	25.9	1	3
50	R	2020	67	26.6	1	3
50	L	2020	67	26.6	1	3
51	R	2011	50	22.6	0	2
51	L	2011	50	22.6	0	2
51	R	2012	51	22.9	0	3
51	L	2012	51	22.9	0	2
51	R	2013	52	22.6	0	2
51	L	2013	52	22.6	0	2
51	R	2014	53	23.5	0	3
51	L	2014	53	23.5	0	2
51	R	2015	54	24.1	0	2
51	L	2015	54	24.1	0	2
51	R	2016	55	23.8	0	3
51	L	2016	55	23.8	0	2
51	R	2017	56	23.3	0	2
51	L	2017	56	23.3	0	2
51	R	2018	57	23.4	0	2
51	L	2018	57	23.4	0	2
51	R	2019	58	23.3	0	3
51	L	2019	58	23.3	0	2
51	R	2020	59	22.8	0	2
51	L	2020	59	22.8	0	2
52	R	2012	45	18.3	1	3
52	L	2012	45	18.3	1	3
52	R	2013	46	17.9	1	3
52	L	2013	46	17.9	1	4
52	R	2014	47	18.4	1	3
52	L	2014	47	18.4	1	3
52	R	2015	48	18.9	1	3
52	L	2015	48	18.9	1	3
52	R	2016	49	19	1	3
52	L	2016	49	19	1	4
52	R	2017	50	19.1	1	3
52	L	2017	50	19.1	1	3
52	R	2018	51	18.6	1	3
52	L	2018	51	18.6	1	3
52	R	2019	52	19.4	1	3
52	L	2019	52	19.4	1	3
52	R	2020	53	19.5	1	3
52	L	2020	53	19.5	1	3
53	R	2012	38	26.3	0	2
53	L	2012	38	26.3	0	2
53	L	2013	39	27	0	1
53	R	2013	39	27	0	2
53	R	2014	40	27.2	0	1
53	L	2014	40	27.2	0	1
53	R	2015	41	27.2	0	2
53	L	2015	41	27.2	0	1
53	R	2016	42	28.8	0	2
53	L	2016	42	28.8	0	2
53	R	2017	43	30.7	0	2
53	L	2017	43	30.7	0	1
53	R	2018	44	31.2	0	2
53	L	2018	44	31.2	0	1
53	R	2019	45	31.6	0	1
53	L	2019	45	31.6	0	2
53	R	2020	46	31	0	1
53	L	2020	46	31	0	1
54	R	2011	59	27.2	0	2
54	L	2011	59	27.2	0	2
54	R	2012	60	26.8	0	2
54	L	2012	60	26.8	0	2
54	R	2013	61	26.9	0	2
54	L	2013	61	26.9	0	2
54	R	2014	62	28.6	0	2
54	L	2014	62	28.6	0	2
54	R	2015	63	28	0	2
54	L	2015	63	28	0	2
54	R	2016	64	27.6	0	2
54	L	2016	64	27.6	0	2
54	R	2017	65	27.9	0	2
54	L	2017	65	27.9	0	2
54	R	2018	66	26.3	0	2
54	L	2018	66	26.3	0	2
54	R	2019	67	24.5	0	2
54	L	2019	67	24.5	0	2
54	R	2020	68	23.8	0	2
54	L	2020	68	23.8	0	2
55	R	2011	55	23.1	1	2
55	L	2011	55	23.1	1	3
55	R	2012	56	24.3	1	2
55	L	2012	56	24.3	1	3
55	L	2013	57	25.2	1	2
55	R	2013	57	25.2	1	3
55	R	2014	58	24.3	1	3
55	L	2014	58	24.3	1	1
55	R	2015	59	23.6	1	3
55	L	2015	59	23.6	1	2
55	R	2016	60	23.9	1	2
55	L	2016	60	23.9	1	2
55	R	2017	61	24.6	1	2
55	L	2017	61	24.6	1	2
55	R	2018	62	24.5	1	2
55	L	2018	62	24.5	1	2
55	R	2019	63	24.2	1	2
55	L	2019	63	24.2	1	2
55	R	2020	64	24.1	1	3
55	L	2020	64	24.1	1	2
56	R	2012	51	20.8	0	3
56	L	2012	51	20.8	0	3
56	R	2013	52	20.8	0	3
56	L	2013	52	20.8	0	2
56	R	2014	53	20.9	0	2
56	L	2014	53	20.9	0	2
56	R	2015	54	21	0	3
56	L	2015	54	21	0	3
56	R	2016	55	20.7	0	3
56	L	2016	55	20.7	0	2
56	R	2017	56	20.4	0	3
56	L	2017	56	20.4	0	3
56	R	2018	57	20.1	0	3
56	L	2018	57	20.1	0	3
56	R	2019	58	20.5	0	3
56	L	2019	58	20.5	0	3
56	R	2020	59	20.4	0	3
56	L	2020	59	20.4	0	2
57	R	2011	55	20.2	1	4
57	L	2011	55	20.2	1	3
57	R	2012	56	20.3	1	2
57	L	2012	56	20.3	1	3
57	R	2013	57	20.5	1	3
57	L	2013	57	20.5	1	3
57	R	2014	58	20.5	1	3
57	L	2014	58	20.5	1	3
57	R	2015	59	20.3	1	3
57	L	2015	59	20.3	1	3
57	R	2016	60	20.1	1	3
57	L	2016	60	20.1	1	3
57	R	2017	61	20.2	1	3
57	L	2017	61	20.2	1	3
57	R	2018	62	19.9	1	3
57	L	2018	62	19.9	1	3
57	R	2019	63	20.2	1	3
57	L	2019	63	20.2	1	3
57	R	2020	64	19.8	1	3
57	L	2020	64	19.8	1	3
58	R	2012	41	23	0	2
58	L	2012	41	23	0	3
58	R	2013	42	22.4	0	2
58	L	2013	42	22.4	0	3
58	R	2014	43	22.7	0	2
58	L	2014	43	22.7	0	3
58	R	2015	44	23.1	0	2
58	L	2015	44	23.1	0	3
58	R	2016	45	22.9	0	2
58	L	2016	45	22.9	0	3
58	R	2017	46	23.2	0	2
58	L	2017	46	23.2	0	3
58	R	2018	47	23.1	0	3
58	L	2018	47	23.1	0	3
58	R	2019	48	22.4	0	2
58	L	2019	48	22.4	0	3
58	R	2020	49	23.7	0	2
58	L	2020	49	23.7	0	3
59	R	2012	42	22.1	0	3
59	L	2012	42	22.1	0	4
59	L	2013	43	22.4	0	3
59	R	2013	43	22.4	0	4
59	R	2014	44	21.8	0	4
59	L	2014	44	21.8	0	4
59	R	2015	45	21.7	0	3
59	L	2015	45	21.7	0	3
59	R	2016	46	22.1	0	3
59	L	2016	46	22.1	0	3
59	R	2017	47	23	0	3
59	L	2017	47	23	0	3
59	R	2018	48	23.3	0	3
59	L	2018	48	23.3	0	3
59	R	2019	49	24.8	0	3
59	L	2019	49	24.8	0	3
59	R	2020	50	23.8	0	3
59	L	2020	50	23.8	0	3
60	R	2012	51	20.3	0	4
60	L	2012	51	20.3	0	3
60	R	2013	52	21.1	0	3
60	L	2013	52	21.1	0	3
60	R	2014	53	21.8	0	3
60	L	2014	53	21.8	0	3
60	R	2015	54	21.2	0	3
60	L	2015	54	21.2	0	3
60	R	2016	55	21.7	0	3
60	L	2016	55	21.7	0	3
60	R	2017	56	22.6	0	3
60	L	2017	56	22.6	0	3
60	R	2018	57	22.2	0	3
60	L	2018	57	22.2	0	3
60	R	2019	58	19.7	0	3
60	L	2019	58	19.7	0	3
60	R	2020	59	20.3	0	3
60	L	2020	59	20.3	0	3
61	R	2011	46	22.4	1	2
61	L	2011	46	22.4	1	3
61	R	2012	47	22	1	3
61	L	2012	47	22	1	3
61	R	2013	48	21.7	1	3
61	L	2013	48	21.7	1	3
61	R	2014	49	22.1	1	3
61	L	2014	49	22.1	1	3
61	R	2015	50	21.2	1	3
61	L	2015	50	21.2	1	3
61	R	2016	51	21.6	1	3
61	L	2016	51	21.6	1	3
61	R	2017	52	21.7	1	3
61	L	2017	52	21.7	1	3
61	R	2018	53	22.6	1	3
61	L	2018	53	22.6	1	3
61	R	2019	54	23	1	3
61	L	2019	54	23	1	3
61	R	2020	55	22.2	1	3
61	L	2020	55	22.2	1	3
62	R	2012	45	20.5	0	3
62	L	2012	45	20.5	0	3
62	R	2013	46	20.3	0	3
62	L	2013	46	20.3	0	3
62	R	2014	47	20.3	0	3
62	L	2014	47	20.3	0	3
62	L	2015	48	20.5	0	3
62	R	2015	48	20.5	0	3
62	R	2016	49	20.8	0	3
62	L	2016	49	20.8	0	3
62	R	2017	50	20.5	0	3
62	L	2017	50	20.5	0	3
62	R	2018	51	21.7	0	3
62	L	2018	51	21.7	0	3
62	R	2019	52	21.2	0	3
62	L	2019	52	21.2	0	3
62	R	2020	53	20.7	0	3
62	L	2020	53	20.7	0	3
63	R	2011	57	16.7	0	2
63	L	2011	57	16.7	0	2
63	R	2012	58	16.3	0	2
63	L	2012	58	16.3	0	4
63	R	2013	58	16	0	3
63	L	2013	58	16	0	4
63	R	2014	59	16	0	4
63	L	2014	59	16	0	4
63	R	2015	60	15.8	0	4
63	L	2015	60	15.8	0	4
63	R	2016	61	16.2	0	3
63	L	2016	61	16.2	0	4
63	R	2017	62	15.9	0	3
63	L	2017	62	15.9	0	4
63	R	2018	63	15.4	0	3
63	L	2018	63	15.4	0	4
63	R	2019	64	15.9	0	3
63	L	2019	64	15.9	0	4
63	R	2020	65	16.1	0	4
63	L	2020	65	16.1	0	4
64	R	2012	50	20.5	0	3
64	L	2012	50	20.5	0	3
64	R	2013	51	20.5	0	3
64	L	2013	51	20.5	0	3
64	R	2014	52	19.8	0	4
64	L	2014	52	19.8	0	3
64	R	2015	53	20.6	0	3
64	L	2015	53	20.6	0	3
64	R	2016	54	20.8	0	3
64	L	2016	54	20.8	0	3
64	R	2017	55	21	0	3
64	L	2017	55	21	0	3
64	R	2018	56	21.6	0	3
64	L	2018	56	21.6	0	3
64	R	2019	57	21.5	0	4
64	L	2019	57	21.5	0	3
64	R	2020	58	21.8	0	4
64	L	2020	58	21.8	0	3
65	R	2012	44	23	0	2
65	L	2012	44	23	0	2
65	R	2013	45	22.9	0	2
65	L	2013	45	22.9	0	2
65	R	2014	46	22.9	0	1
65	L	2014	46	22.9	0	2
65	R	2015	47	22.6	0	2
65	L	2015	47	22.6	0	2
65	R	2016	48	24.3	0	2
65	L	2016	48	24.3	0	1
65	R	2017	49	22.1	0	2
65	L	2017	49	22.1	0	2
65	R	2018	50	22.2	0	2
65	L	2018	50	22.2	0	2
65	R	2019	51	23.2	0	1
65	L	2019	51	23.2	0	2
65	R	2020	52	23.6	0	2
65	L	2020	52	23.6	0	2
66	R	2012	45	25.8	0	2
66	L	2012	45	25.8	0	3
66	L	2013	46	25.8	0	2
66	R	2013	46	25.8	0	2
66	L	2014	47	27.4	0	2
66	R	2014	47	27.4	0	2
66	R	2015	48	26.3	0	2
66	L	2015	48	26.3	0	3
66	R	2016	49	25.6	0	2
66	L	2016	49	25.6	0	3
66	R	2017	50	26.3	0	3
66	L	2017	50	26.3	0	3
66	R	2018	51	25.7	0	3
66	L	2018	51	25.7	0	3
66	R	2019	52	25.5	0	2
66	L	2019	52	25.5	0	2
66	R	2020	53	26.1	0	2
66	L	2020	53	26.1	0	2
67	R	2012	54	22.4	1	3
67	L	2012	54	22.4	1	2
67	R	2013	55	21.2	1	2
67	L	2013	55	21.2	1	3
67	R	2014	56	20.7	1	2
67	L	2014	56	20.7	1	2
67	R	2015	57	21.5	1	2
67	L	2015	57	21.5	1	2
67	R	2016	58	22.5	1	2
67	L	2016	58	22.5	1	2
67	R	2017	59	22.5	1	2
67	L	2017	59	22.5	1	2
67	R	2018	60	22.4	1	2
67	L	2018	60	22.4	1	2
67	R	2019	61	22.6	1	3
67	L	2019	61	22.6	1	2
67	R	2020	62	22.4	1	2
67	L	2020	62	22.4	1	2
68	R	2011	46	22.7	1	3
68	L	2011	46	22.7	1	3
68	R	2012	47	22.4	1	3
68	L	2012	47	22.4	1	3
68	R	2013	48	22.1	1	3
68	L	2013	48	22.1	1	3
68	L	2014	49	22.2	1	3
68	R	2014	49	22.2	1	2
68	R	2015	50	22.6	1	3
68	L	2015	50	22.6	1	3
68	R	2016	51	22.4	1	3
68	L	2016	51	22.4	1	3
68	R	2017	52	22.2	1	3
68	L	2017	52	22.2	1	3
68	R	2018	53	22.4	1	3
68	L	2018	53	22.4	1	3
68	R	2019	54	22.2	1	3
68	L	2019	54	22.2	1	3
68	R	2020	55	22.6	1	3
68	L	2020	55	22.6	1	3
69	R	2012	57	21.7	0	3
69	L	2012	57	21.7	0	3
69	R	2013	58	21.8	0	3
69	L	2013	58	21.8	0	3
69	R	2014	59	22	0	3
69	L	2014	59	22	0	3
69	R	2015	60	21.8	0	4
69	L	2015	60	21.8	0	3
69	R	2016	61	22.2	0	3
69	L	2016	61	22.2	0	3
69	R	2017	62	22	0	3
69	L	2017	62	22	0	3
69	R	2018	62	22.9	0	4
69	L	2018	62	22.9	0	3
69	R	2019	63	22.3	0	4
69	L	2019	63	22.3	0	3
69	R	2020	65	23.4	0	3
69	L	2020	65	23.4	0	3
70	R	2012	53	27.5	0	3
70	L	2012	53	27.5	0	3
70	R	2013	54	28	0	3
70	L	2013	54	28	0	2
70	L	2014	55	29	0	2
70	R	2014	55	29	0	3
70	L	2015	56	29	0	3
70	R	2015	56	29	0	3
70	R	2016	57	29.5	0	3
70	L	2016	57	29.5	0	2
70	R	2017	58	28.6	0	3
70	L	2017	58	28.6	0	3
70	R	2018	59	27.7	0	3
70	L	2018	59	27.7	0	3
70	R	2019	60	28.2	0	3
70	L	2019	60	28.2	0	2
70	R	2020	61	25.3	0	3
70	L	2020	61	25.3	0	3
71	R	2012	58	23.2	1	3
71	L	2012	58	23.2	1	3
71	R	2013	59	22.2	1	3
71	L	2013	59	22.2	1	3
71	R	2014	60	22.1	1	3
71	L	2014	60	22.1	1	3
71	R	2015	61	21.7	1	3
71	L	2015	61	21.7	1	3
71	R	2016	62	23.9	1	3
71	L	2016	62	23.9	1	3
71	R	2017	63	23.6	1	3
71	L	2017	63	23.6	1	3
71	R	2018	64	23.7	1	3
71	L	2018	64	23.7	1	3
71	R	2019	65	22.6	1	3
71	L	2019	65	22.6	1	3
71	R	2020	66	23.2	1	3
71	L	2020	66	23.2	1	3
72	R	2012	38	20.5	0	3
72	L	2012	38	20.5	0	3
72	L	2013	39	20.5	0	3
72	R	2013	39	20.5	0	3
72	R	2014	40	21.4	0	3
72	L	2014	40	21.4	0	3
72	R	2015	41	21.1	0	3
72	L	2015	41	21.1	0	3
72	R	2016	42	22.1	0	3
72	L	2016	42	22.1	0	3
72	R	2017	43	21.2	0	3
72	L	2017	43	21.2	0	3
72	R	2018	44	19.2	0	3
72	L	2018	44	19.2	0	3
72	R	2019	45	20.4	0	3
72	L	2019	45	20.4	0	3
72	R	2020	46	20.1	0	3
72	L	2020	46	20.1	0	3
73	R	2012	55	22.4	0	3
73	L	2012	55	22.4	0	2
73	R	2013	56	22	0	2
73	L	2013	56	22	0	2
73	L	2015	58	20.5	0	2
73	R	2015	58	20.5	0	2
73	R	2016	59	21.5	0	3
73	L	2016	59	21.5	0	2
73	R	2017	60	21	0	2
73	L	2017	60	21	0	2
73	R	2018	61	20.8	0	2
73	L	2018	61	20.8	0	2
73	R	2019	62	21	0	2
73	L	2019	62	21	0	2
73	R	2020	63	21.2	0	2
73	L	2020	63	21.2	0	2
74	R	2011	45	22.5	1	2
74	L	2011	45	22.5	1	3
74	R	2012	46	22	1	3
74	L	2012	46	22	1	3
74	R	2013	47	22.2	1	3
74	L	2013	47	22.2	1	3
74	R	2014	48	21.5	1	3
74	L	2014	48	21.5	1	3
74	R	2015	49	21.5	1	3
74	L	2015	49	21.5	1	3
74	R	2016	50	22	1	3
74	L	2016	50	22	1	3
74	R	2017	51	21.9	1	3
74	L	2017	51	21.9	1	3
74	R	2018	52	22.6	1	3
74	L	2018	52	22.6	1	3
74	R	2019	53	22.6	1	3
74	L	2019	53	22.6	1	3
74	R	2020	54	21.8	1	3
74	L	2020	54	21.8	1	3
75	R	2013	54	20	0	3
75	L	2013	54	20	0	3
75	R	2014	56	20.9	0	3
75	L	2014	56	20.9	0	3
75	L	2015	57	20.7	0	2
75	R	2015	57	20.7	0	3
75	R	2016	58	20.7	0	2
75	L	2016	58	20.7	0	3
75	R	2017	59	20.5	0	3
75	L	2017	59	20.5	0	3
75	R	2018	60	20.5	0	2
75	L	2018	60	20.5	0	3
76	R	2011	44	21.4	1	4
76	L	2011	44	21.4	1	3
76	R	2012	45	21.2	1	3
76	L	2012	45	21.2	1	3
76	R	2013	46	21	1	3
76	L	2013	46	21	1	3
76	L	2014	47	21.5	1	2
76	R	2014	47	21.5	1	2
76	R	2015	48	21.2	1	3
76	L	2015	48	21.2	1	2
76	R	2016	49	21.5	1	3
76	L	2016	49	21.5	1	3
76	R	2017	50	21.8	1	3
76	L	2017	50	21.8	1	3
76	R	2018	51	21.7	1	3
76	L	2018	51	21.7	1	3
76	R	2019	52	21.3	1	3
76	L	2019	52	21.3	1	3
76	R	2020	53	22.3	1	3
76	L	2020	53	22.3	1	3
77	R	2012	37	22.8	0	4
77	L	2012	37	22.8	0	3
77	R	2013	38	23.1	0	3
77	L	2013	38	23.1	0	3
77	R	2014	39	24.8	0	3
77	L	2014	39	24.8	0	3
77	R	2015	40	23.7	0	3
77	L	2015	40	23.7	0	3
77	R	2016	41	24.8	0	3
77	L	2016	41	24.8	0	3
77	R	2017	42	23.5	0	3
77	L	2017	42	23.5	0	3
77	R	2018	43	24	0	3
77	L	2018	43	24	0	2
77	R	2019	44	23.9	0	3
77	L	2019	44	23.9	0	3
77	R	2020	45	24.2	0	3
77	L	2020	45	24.2	0	3
78	R	2012	33	16.5	0	4
78	L	2012	33	16.5	0	3
78	R	2013	34	17.2	0	3
78	L	2013	34	17.2	0	3
78	R	2014	35	16.8	0	3
78	L	2014	35	16.8	0	3
78	L	2015	36	16.7	0	3
78	R	2015	36	16.7	0	3
78	R	2016	37	16.7	0	3
78	L	2016	37	16.7	0	3
78	R	2017	38	17.8	0	3
78	L	2017	38	17.8	0	3
78	R	2018	39	17.1	0	3
78	L	2018	39	17.1	0	3
78	R	2019	40	17.4	0	3
78	L	2019	40	17.4	0	3
78	R	2020	41	17.2	0	3
78	L	2020	41	17.2	0	3
79	R	2011	63	21.1	1	3
79	L	2011	63	21.1	1	3
79	R	2012	64	21.9	1	3
79	L	2012	64	21.9	1	3
79	R	2013	65	22.3	1	3
79	L	2013	65	22.3	1	3
79	L	2014	66	21.9	1	3
79	R	2014	66	21.9	1	3
79	R	2015	67	21.4	1	3
79	L	2015	67	21.4	1	3
79	R	2016	68	21.1	1	3
79	L	2016	68	21.1	1	3
79	R	2017	69	22.3	1	3
79	L	2017	69	22.3	1	3
79	R	2018	70	22.3	1	3
79	L	2018	70	22.3	1	3
79	R	2019	71	22.2	1	3
79	L	2019	71	22.2	1	3
79	R	2020	72	22.1	1	3
79	L	2020	72	22.1	1	3
80	R	2011	53	18	0	3
80	L	2011	53	18	0	3
80	R	2012	54	18.3	0	4
80	L	2012	54	18.3	0	3
80	R	2013	55	18.4	0	2
80	L	2013	55	18.4	0	2
80	R	2014	56	18	0	3
80	L	2014	56	18	0	4
80	L	2015	57	17.7	0	3
80	R	2015	57	17.7	0	3
80	R	2016	58	17.6	0	2
80	L	2016	58	17.6	0	3
80	R	2017	59	18.5	0	3
80	L	2017	59	18.5	0	2
80	R	2018	60	18.1	0	3
80	L	2018	60	18.1	0	3
80	R	2019	61	18.2	0	3
80	L	2019	61	18.2	0	2
80	R	2020	62	18.4	0	3
80	L	2020	62	18.4	0	3
81	R	2011	55	19.3	0	4
81	L	2011	55	19.3	0	3
81	R	2012	56	19.4	0	3
81	L	2012	56	19.4	0	3
81	L	2013	57	19.3	0	2
81	R	2013	57	19.3	0	2
81	R	2014	58	18.7	0	3
81	L	2014	58	18.7	0	2
81	R	2015	59	18.8	0	3
81	L	2015	59	18.8	0	3
81	R	2016	60	18.8	0	2
81	L	2016	60	18.8	0	3
81	R	2017	61	18.3	0	3
81	L	2017	61	18.3	0	3
81	R	2018	62	18.7	0	2
81	L	2018	62	18.7	0	2
81	R	2019	63	18.4	0	2
81	L	2019	63	18.4	0	2
81	R	2020	64	18.9	0	2
81	L	2020	64	18.9	0	2
82	R	2012	41	23.8	0	3
82	L	2012	41	23.8	0	3
82	R	2013	42	23.8	0	3
82	L	2013	42	23.8	0	2
82	R	2014	43	22.9	0	3
82	L	2014	43	22.9	0	2
82	R	2015	44	24.2	0	3
82	L	2015	44	24.2	0	3
82	R	2016	45	23.5	0	3
82	L	2016	45	23.5	0	2
82	R	2017	46	22.5	0	3
82	L	2017	46	22.5	0	3
82	R	2018	47	21.3	0	3
82	L	2018	47	21.3	0	3
82	R	2019	48	21.3	0	3
82	L	2019	48	21.3	0	3
82	R	2020	49	22.3	0	3
82	L	2020	49	22.3	0	3
83	R	2012	54	25.1	0	2
83	L	2012	54	25.1	0	2
83	R	2013	55	25	0	2
83	L	2013	55	25	0	2
83	L	2014	56	24.9	0	2
83	R	2014	56	24.9	0	2
83	R	2015	57	24.6	0	2
83	L	2015	57	24.6	0	2
83	R	2016	58	25.2	0	2
83	L	2016	58	25.2	0	2
83	R	2017	59	25.6	0	3
83	L	2017	59	25.6	0	2
83	R	2018	60	25.3	0	2
83	L	2018	60	25.3	0	2
83	R	2019	61	25.4	0	2
83	L	2019	61	25.4	0	2
83	R	2020	62	25.7	0	3
83	L	2020	62	25.7	0	2
84	R	2012	44	20.6	0	3
84	L	2012	44	20.6	0	3
84	R	2013	45	19.4	0	3
84	L	2013	45	19.4	0	3
84	R	2014	46	19.2	0	3
84	L	2014	46	19.2	0	3
84	R	2015	47	19.9	0	3
84	L	2015	47	19.9	0	3
84	R	2016	48	19.4	0	3
84	L	2016	48	19.4	0	3
84	R	2017	49	19.3	0	3
84	L	2017	49	19.3	0	3
84	R	2018	50	20.2	0	3
84	L	2018	50	20.2	0	3
84	R	2019	51	19.9	0	3
84	L	2019	51	19.9	0	3
84	R	2020	52	19.6	0	3
84	L	2020	52	19.6	0	3
85	R	2013	45	24.3	0	2
85	L	2013	45	24.3	0	3
85	R	2014	46	23.4	0	2
85	L	2014	46	23.4	0	3
85	R	2015	47	24.5	0	2
85	L	2015	47	24.5	0	3
85	R	2016	48	25.4	0	3
85	L	2016	48	25.4	0	3
85	R	2017	49	25.4	0	2
85	L	2017	49	25.4	0	2
85	R	2018	50	24.5	0	2
85	L	2018	50	24.5	0	3
85	R	2019	51	25.1	0	3
85	L	2019	51	25.1	0	3
85	R	2020	52	25.4	0	3
85	L	2020	52	25.4	0	3
86	R	2012	48	17.7	0	3
86	L	2012	48	17.7	0	3
86	R	2013	49	17.9	0	3
86	L	2013	49	17.9	0	3
86	R	2014	50	18.5	0	3
86	L	2014	50	18.5	0	3
86	R	2015	51	18.1	0	3
86	L	2015	51	18.1	0	3
86	R	2016	52	18.3	0	3
86	L	2016	52	18.3	0	3
86	R	2017	53	18.7	0	3
86	L	2017	53	18.7	0	3
86	R	2018	54	18.8	0	3
86	L	2018	54	18.8	0	3
86	R	2019	55	18.8	0	3
86	L	2019	55	18.8	0	3
86	R	2020	56	18.6	0	3
86	L	2020	56	18.6	0	2
87	R	2012	60	15.7	1	4
87	L	2012	60	15.7	1	3
87	R	2013	60	15.9	1	4
87	L	2013	60	15.9	1	4
87	R	2014	62	16.5	1	4
87	L	2014	62	16.5	1	3
87	R	2015	63	16.5	1	3
87	L	2015	63	16.5	1	4
87	R	2016	63	16.3	1	3
87	L	2016	63	16.3	1	3
87	R	2017	64	16.5	1	3
87	L	2017	64	16.5	1	4
87	R	2018	65	16.2	1	3
87	L	2018	65	16.2	1	4
87	R	2019	67	16	1	3
87	L	2019	67	16	1	4
87	R	2020	68	16	1	4
87	L	2020	68	16	1	3
88	R	2012	59	18.4	0	3
88	L	2012	59	18.4	0	3
88	R	2013	60	18.7	0	2
88	L	2013	60	18.7	0	3
88	R	2014	61	17.8	0	2
88	L	2014	61	17.8	0	3
88	R	2015	62	18.1	0	2
88	L	2015	62	18.1	0	3
88	R	2016	63	19.1	0	3
88	L	2016	63	19.1	0	3
88	R	2017	64	#N/A	0	2
88	L	2017	64	#N/A	0	2
88	R	2018	65	19	0	2
88	L	2018	65	19	0	2
88	R	2019	66	19.7	0	3
88	L	2019	66	19.7	0	3
88	R	2020	67	20.1	0	2
88	L	2020	67	20.1	0	2
89	R	2012	45	18	0	4
89	L	2012	45	18	0	3
89	L	2013	46	18.4	0	4
89	R	2013	46	18.4	0	3
89	R	2014	47	18.5	0	3
89	L	2014	47	18.5	0	3
89	R	2015	48	19.9	0	3
89	L	2015	48	19.9	0	3
89	R	2016	49	18.6	0	3
89	L	2016	49	18.6	0	3
89	R	2017	50	18.7	0	3
89	L	2017	50	18.7	0	3
89	R	2018	51	18.3	0	3
89	L	2018	51	18.3	0	3
89	R	2019	52	18.2	0	3
89	L	2019	52	18.2	0	3
89	R	2020	53	17.4	0	3
89	L	2020	53	17.4	0	3
90	R	2012	44	19.5	0	3
90	L	2012	44	19.5	0	3
90	R	2013	45	19.6	0	3
90	L	2013	45	19.6	0	3
90	R	2014	46	20.3	0	3
90	L	2014	46	20.3	0	3
90	R	2015	47	20.6	0	3
90	L	2015	47	20.6	0	3
90	R	2016	48	19.5	0	3
90	L	2016	48	19.5	0	3
90	R	2017	49	19.8	0	3
90	L	2017	49	19.8	0	3
90	R	2018	50	20.4	0	3
90	L	2018	50	20.4	0	3
90	R	2019	51	19.3	0	3
90	L	2019	51	19.3	0	3
90	R	2020	52	20.5	0	3
90	L	2020	52	20.5	0	3
91	R	2012	41	19	0	4
91	L	2012	41	19	0	3
91	R	2013	42	18.3	0	4
91	L	2013	42	18.3	0	4
91	R	2014	43	18.5	0	4
91	L	2014	43	18.5	0	3
91	R	2015	44	18.5	0	4
91	L	2015	44	18.5	0	3
91	R	2016	45	19.7	0	4
91	L	2016	45	19.7	0	3
91	R	2017	46	19	0	3
91	L	2017	46	19	0	3
91	R	2018	47	18.9	0	4
91	L	2018	47	18.9	0	3
91	R	2019	48	18.3	0	3
91	L	2019	48	18.3	0	3
91	R	2020	49	18.9	0	4
91	L	2020	49	18.9	0	3
92	R	2011	50	22.5	1	3
92	L	2011	50	22.5	1	3
92	R	2012	51	22.9	1	2
92	L	2012	51	22.9	1	3
92	R	2013	52	22	1	3
92	L	2013	52	22	1	2
92	R	2014	53	21.6	1	3
92	L	2014	53	21.6	1	3
92	R	2015	54	21.6	1	3
92	L	2015	54	21.6	1	3
92	R	2016	55	22.2	1	3
92	L	2016	55	22.2	1	3
92	R	2017	56	22.9	1	3
92	L	2017	56	22.9	1	3
92	R	2018	57	22.8	1	3
92	L	2018	57	22.8	1	3
92	R	2019	58	24.3	1	3
92	L	2019	58	24.3	1	3
92	R	2020	59	23.9	1	3
92	L	2020	59	23.9	1	3
93	R	2012	56	#N/A	1	2
93	L	2012	56	#N/A	1	2
93	R	2013	57	21.8	1	3
93	L	2013	57	21.8	1	3
93	R	2014	58	23.6	1	3
93	L	2014	58	23.6	1	3
93	L	2015	59	22.5	1	2
93	R	2015	59	22.5	1	3
93	R	2016	60	22.8	1	3
93	L	2016	60	22.8	1	3
93	R	2017	61	25.4	1	3
93	L	2017	61	25.4	1	3
93	R	2018	62	25.9	1	3
93	L	2018	62	25.9	1	3
93	R	2019	63	25.1	1	3
93	L	2019	63	25.1	1	3
93	R	2020	64	22.6	1	3
93	L	2020	64	22.6	1	3
94	R	2011	42	21.9	1	3
94	L	2011	42	21.9	1	3
94	R	2012	43	21.8	1	3
94	L	2012	43	21.8	1	3
94	R	2013	44	22.2	1	3
94	L	2013	44	22.2	1	2
94	L	2014	45	22.4	1	2
94	R	2014	45	22.4	1	3
94	R	2015	46	21.6	1	3
94	L	2015	46	21.6	1	3
94	R	2016	47	21.9	1	3
94	L	2016	47	21.9	1	3
94	R	2017	48	21.8	1	3
94	L	2017	48	21.8	1	3
94	R	2018	50	21.9	1	3
94	L	2018	50	21.9	1	3
94	R	2019	51	22.1	1	3
94	L	2019	51	22.1	1	3
94	R	2020	52	22.5	1	3
94	L	2020	52	22.5	1	2
95	R	2012	45	20.4	0	3
95	L	2012	45	20.4	0	3
95	R	2013	46	20.8	0	4
95	L	2013	46	20.8	0	3
95	R	2014	47	20.2	0	4
95	L	2014	47	20.2	0	4
95	R	2015	48	19.5	0	3
95	L	2015	48	19.5	0	4
95	R	2016	49	19.5	0	4
95	L	2016	49	19.5	0	4
95	R	2017	50	19.6	0	3
95	L	2017	50	19.6	0	4
95	R	2018	51	20.1	0	3
95	L	2018	51	20.1	0	4
95	R	2019	52	20.7	0	3
95	L	2019	52	20.7	0	3
95	R	2020	53	20.2	0	3
95	L	2020	53	20.2	0	4
96	R	2012	49	22.4	0	3
96	L	2012	49	22.4	0	3
96	R	2013	51	24.1	0	3
96	L	2013	51	24.1	0	2
96	R	2014	52	23.3	0	2
96	L	2014	52	23.3	0	2
96	R	2015	53	21.9	0	3
96	L	2015	53	21.9	0	3
96	L	2016	54	21.9	0	2
96	R	2016	54	21.9	0	3
96	L	2017	55	22.6	0	2
96	R	2017	55	22.6	0	2
96	L	2018	56	23.3	0	2
96	R	2018	56	23.3	0	3
97	R	2012	42	22.8	0	3
97	L	2012	42	22.8	0	3
97	R	2013	43	23.3	0	3
97	L	2013	43	23.3	0	3
97	R	2014	44	23.3	0	3
97	L	2014	44	23.3	0	3
97	L	2015	45	24.3	0	3
97	R	2015	45	24.3	0	3
97	R	2016	46	25.1	0	3
97	L	2016	46	25.1	0	3
97	R	2017	47	25.7	0	2
97	L	2017	47	25.7	0	3
97	R	2018	48	26.4	0	3
97	L	2018	48	26.4	0	3
97	R	2019	49	27.5	0	3
97	L	2019	49	27.5	0	3
97	R	2020	50	26	0	3
97	L	2020	50	26	0	3
98	R	2012	43	24.4	0	3
98	L	2012	43	24.4	0	3
98	L	2013	44	25.2	0	2
98	R	2013	44	25.2	0	3
98	R	2014	45	26	0	3
98	L	2014	45	26	0	2
98	L	2015	46	26.4	0	2
98	R	2015	46	26.4	0	2
98	R	2016	47	26.6	0	2
98	L	2016	47	26.6	0	3
98	R	2017	48	26.8	0	3
98	L	2017	48	26.8	0	3
98	R	2018	49	26.9	0	2
98	L	2018	49	26.9	0	3
98	R	2019	50	27.3	0	3
98	L	2019	50	27.3	0	3
98	R	2020	51	27.6	0	2
98	L	2020	51	27.6	0	2
99	R	2012	48	22.3	0	3
99	L	2012	48	22.3	0	2
99	R	2013	49	22.5	0	3
99	L	2013	49	22.5	0	2
99	L	2014	50	21.8	0	2
99	R	2014	50	21.8	0	3
99	R	2015	51	20.7	0	3
99	L	2015	51	20.7	0	3
99	R	2016	52	22	0	3
99	L	2016	52	22	0	2
99	R	2017	53	21.9	0	3
99	L	2017	53	21.9	0	2
99	R	2018	54	20.5	0	3
99	L	2018	54	20.5	0	3
99	R	2019	55	21.3	0	3
99	L	2019	55	21.3	0	2
99	R	2020	56	20.4	0	3
99	L	2020	56	20.4	0	3
100	R	2012	41	20.3	1	3
100	L	2012	41	20.3	1	3
100	R	2013	42	#N/A	1	3
100	L	2013	42	#N/A	1	3
100	R	2014	43	21.1	1	3
100	L	2014	43	21.1	1	2
100	L	2015	44	21.9	1	2
100	R	2015	44	21.9	1	3
100	R	2016	45	21.8	1	3
100	L	2016	45	21.8	1	2
100	R	2017	46	22.7	1	3
100	L	2017	46	22.7	1	3
100	R	2018	47	23.8	1	3
100	L	2018	47	23.8	1	2
100	R	2019	48	24.2	1	3
100	L	2019	48	24.2	1	2
100	R	2020	49	25	1	3
100	L	2020	49	25	1	2
101	R	2011	40	19.2	1	4
101	L	2011	40	19.2	1	2
101	R	2012	41	19.5	1	3
101	L	2012	41	19.5	1	3
101	R	2013	42	20.1	1	3
101	L	2013	42	20.1	1	3
101	R	2014	43	20	1	3
101	L	2014	43	20	1	2
101	R	2015	44	19.8	1	3
101	L	2015	44	19.8	1	3
101	R	2016	45	20.5	1	3
101	L	2016	45	20.5	1	2
101	R	2017	46	20.5	1	3
101	L	2017	46	20.5	1	2
101	R	2018	47	20.8	1	3
101	L	2018	47	20.8	1	2
101	R	2019	48	20.7	1	3
101	L	2019	48	20.7	1	2
101	R	2020	49	21.7	1	3
101	L	2020	49	21.7	1	2
102	R	2012	51	22.5	1	3
102	L	2012	51	22.5	1	3
102	R	2013	52	22.7	1	3
102	L	2013	52	22.7	1	3
102	R	2014	53	23.7	1	3
102	L	2014	53	23.7	1	2
102	R	2015	54	24.5	1	3
102	L	2015	54	24.5	1	3
102	R	2016	55	24	1	3
102	L	2016	55	24	1	3
102	R	2017	56	24	1	3
102	L	2017	56	24	1	2
102	R	2018	57	25	1	3
102	L	2018	57	25	1	3
102	R	2019	58	23.8	1	3
102	L	2019	58	23.8	1	2
102	R	2020	59	24.3	1	3
102	L	2020	59	24.3	1	2
103	R	2011	54	22.6	1	2
103	L	2011	54	22.6	1	3
103	R	2012	55	22.2	1	3
103	L	2012	55	22.2	1	3
103	R	2013	56	21.9	1	2
103	L	2013	56	21.9	1	3
103	R	2014	57	22	1	3
103	L	2014	57	22	1	3
103	R	2015	58	22.2	1	3
103	L	2015	58	22.2	1	3
103	R	2016	59	22.4	1	3
103	L	2016	59	22.4	1	3
103	R	2017	60	22.6	1	3
103	L	2017	60	22.6	1	3
103	R	2018	61	22.4	1	3
103	L	2018	61	22.4	1	3
103	R	2019	62	22.5	1	3
103	L	2019	62	22.5	1	3
103	R	2020	63	21.6	1	3
103	L	2020	63	21.6	1	3
104	R	2011	62	21.7	1	3
104	L	2011	62	21.7	1	3
104	R	2012	63	21	1	3
104	L	2012	63	21	1	3
104	R	2013	64	21.4	1	2
104	L	2013	64	21.4	1	2
104	R	2014	65	21.4	1	2
104	L	2014	65	21.4	1	2
104	R	2015	66	21.3	1	2
104	L	2015	66	21.3	1	2
104	R	2016	67	21.3	1	3
104	L	2016	67	21.3	1	2
104	R	2017	68	21	1	2
104	L	2017	68	21	1	3
104	R	2018	69	21.3	1	3
104	L	2018	69	21.3	1	2
104	R	2019	70	21.2	1	3
104	L	2019	70	21.2	1	3
104	R	2020	71	21.6	1	2
104	L	2020	71	21.6	1	2
105	R	2012	54	18	0	3
105	L	2012	54	18	0	3
105	R	2013	55	17.8	0	3
105	L	2013	55	17.8	0	3
105	L	2014	56	18.4	0	3
105	R	2014	56	18.4	0	3
105	R	2015	57	18.2	0	3
105	L	2015	57	18.2	0	3
105	R	2016	57	18.7	0	3
105	L	2016	57	18.7	0	3
105	R	2017	58	18.4	0	3
105	L	2017	58	18.4	0	3
105	R	2018	59	18.5	0	3
105	L	2018	59	18.5	0	3
105	R	2019	60	18.6	0	3
105	L	2019	60	18.6	0	3
105	R	2020	61	18.1	0	3
105	L	2020	61	18.1	0	3
106	R	2011	46	22.9	0	2
106	L	2011	46	22.9	0	2
106	R	2012	47	21.8	0	3
106	L	2012	47	21.8	0	3
106	R	2013	48	22.1	0	2
106	L	2013	48	22.1	0	2
106	R	2014	49	22	0	3
106	L	2014	49	22	0	2
106	R	2015	50	23.2	0	3
106	L	2015	50	23.2	0	2
106	R	2016	51	23.7	0	3
106	L	2016	51	23.7	0	2
106	R	2017	52	24.4	0	3
106	L	2017	52	24.4	0	2
106	R	2018	53	25.5	0	2
106	L	2018	53	25.5	0	3
106	R	2019	54	27	0	3
106	L	2019	54	27	0	2
106	R	2020	55	28	0	2
106	L	2020	55	28	0	2
107	R	2011	48	24.4	0	3
107	L	2011	48	24.4	0	2
107	R	2012	49	24.8	0	3
107	L	2012	49	24.8	0	3
107	L	2013	50	24.6	0	2
107	R	2013	50	24.6	0	2
107	R	2014	51	25	0	3
107	L	2014	51	25	0	2
107	R	2015	52	24.3	0	3
107	L	2015	52	24.3	0	2
107	R	2016	53	25.2	0	3
107	L	2016	53	25.2	0	2
107	R	2017	54	25.1	0	2
107	L	2017	54	25.1	0	2
107	R	2018	55	25.6	0	2
107	L	2018	55	25.6	0	2
107	R	2019	56	25.4	0	2
107	L	2019	56	25.4	0	2
107	R	2020	57	25.2	0	2
107	L	2020	57	25.2	0	3
108	R	2012	38	18	0	3
108	L	2012	38	18	0	3
108	R	2013	39	17.6	0	4
108	L	2013	39	17.6	0	3
108	L	2014	40	17.9	0	3
108	R	2014	40	17.9	0	3
108	R	2015	41	17.8	0	3
108	L	2015	41	17.8	0	3
108	R	2016	42	18.3	0	3
108	L	2016	42	18.3	0	3
108	R	2017	43	18.1	0	3
108	L	2017	43	18.1	0	3
108	R	2018	44	18.6	0	3
108	L	2018	44	18.6	0	3
108	R	2019	45	18.5	0	3
108	L	2019	45	18.5	0	3
108	R	2020	46	18.6	0	3
108	L	2020	46	18.6	0	3
109	R	2012	45	21	0	2
109	L	2012	45	21	0	2
109	R	2013	46	20.9	0	2
109	L	2013	46	20.9	0	2
109	L	2014	47	21.1	0	2
109	R	2014	47	21.1	0	2
109	R	2015	48	20.2	0	2
109	L	2015	48	20.2	0	2
109	R	2016	49	20.9	0	3
109	L	2016	49	20.9	0	2
109	R	2017	51	21.5	0	3
109	L	2017	51	21.5	0	2
109	R	2018	52	21.8	0	3
109	L	2018	52	21.8	0	2
109	R	2019	53	21.6	0	2
109	L	2019	53	21.6	0	2
109	R	2020	54	22.7	0	3
109	L	2020	54	22.7	0	2
110	R	2012	62	19.7	1	3
110	L	2012	62	19.7	1	3
110	R	2013	63	17.9	1	3
110	L	2013	63	17.9	1	3
110	R	2014	64	18.8	1	3
110	L	2014	64	18.8	1	3
110	R	2015	65	19.4	1	3
110	L	2015	65	19.4	1	3
110	R	2016	66	18.9	1	3
110	L	2016	66	18.9	1	3
110	R	2017	67	19.2	1	3
110	L	2017	67	19.2	1	3
110	R	2018	68	19.5	1	3
[truncated: 1,983 more rows]
